# Supplementary material for: l‐α‐Lysophosphatidylinositol (LPI) aggravates myocardial ischemia/reperfusion injury via a GPR55/ROCK‐dependent pathway
Source: PubMed Central journal article supplement (PMC6533556; doi:10.1002/prp2.487), 2019-05-24

Supplementary Figure 1

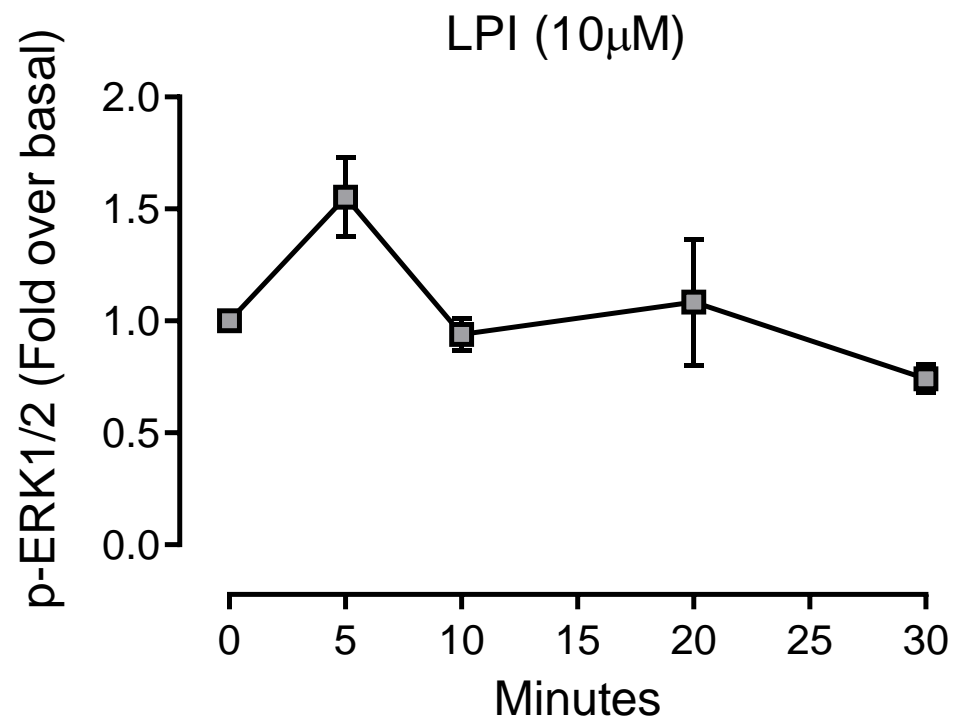

Supplement: PRP2-7-e00487-s001.pdf [file PRP2-7-e00487-s001.pdf]
